# Supplementary material
Source: PubMed Central journal article supplement (PMC6283270)
Supplement: NIHMS80614-supplement-Supplementary_Information.pdf [file NIHMS80614-supplement-Supplementary_Information.pdf]

# Supplementary information

## Regeneration of the entire human epidermis by transgenic stem cells

Tobias Hirsch, Tobias Rothoefl, Norbert Teig, Johann W. Bauer, Graziella Pellegrini, Laura De Rosa, Davide Scaglione, Julia Reichelt, Alfred Klausegger, Daniela Kneisz, Oriana Romano, Alessia Secone Seconetti, Roberta Contin, Elena Enzo, Irena Jurman, Sonia Carulli, Frank Jacobsen, Thomas Luecke, Marcus Lehnhardt, Meike Fischer, Maximilian Kueckelhaus, Daniela Quaglino, Michele Morgante, Silvio Bicciato, Sergio Bondanza, Michele De Luca

|                                                                                                                                                                  |          |
|------------------------------------------------------------------------------------------------------------------------------------------------------------------|----------|
| <b>Supplementary Tables</b> .....                                                                                                                                | <b>1</b> |
| <b>Supplementary Table 1. List of I7-index primers and I5 LTR-primers used for library preparation</b> .....                                                     | <b>1</b> |
| <b>Supplementary Table 2. List of primers used for LAM-PCR on holoclones</b> .....                                                                               | <b>2</b> |
| <b>Supplementary Table 3. List of primers used for PCR on meroclones and paraclones in PGc, 4Mc, and 8Mc<sub>1</sub></b> .....                                   | <b>3</b> |
| <b>Supplementary Table 4. List of independent integrations identified by NGS analysis in PGc, 4Mc, 8Mc<sub>1</sub> and 8Mc<sub>2</sub> and merged data</b> ..... | <b>4</b> |
| <b>Supplementary Data</b> .....                                                                                                                                  | <b>5</b> |

## Supplementary Tables

**Supplementary Table 1. List of I7-index primers and I5 LTR-primers used for library preparation.**

| <i>Primer set</i> | <i>Primer name</i>   | <i>Primer sequence</i>                                                                               |
|-------------------|----------------------|------------------------------------------------------------------------------------------------------|
| I7                | Linker_primer_701_N  | CAAGCAGAAGACGGCATAACGAGATCGAGTAATGTGACTGGAGTTCAGACGTGTGCTCTTCCGATCTGTAATACGACTCACTATAGGGC            |
|                   | Linker_primer_702_N  | CAAGCAGAAGACGGCATAACGAGATTCTCCGGAGTGACTGGAGTTCAGACGTGTGCTCTTCCGATCTGTAATACGACTCACTATAGGGC            |
|                   | Linker_primer_703_N  | CAAGCAGAAGACGGCATAACGAGATAATGAGCGGTGACTGGAGTTCAGACGTGTGCTCTTCCGATCTGTAATACGACTCACTATAGGGC            |
| I5                | MuLV_LTR-3pIN_501_N  | AATGATACGGCGACCACCGAGATCTACACTATAGCCTACACTCTTTCCC<br>TACACGACGCTCTTCCGATCTGACTTGTGGTCTCGCTGTTCTTGG   |
|                   | MuLV_LTR-3pOUT_502_N | AATGATACGGCGACCACCGAGATCTACACATAGAGGCACACTCTTTCC<br>CTACACGACGCTCTTCCGATCTGGGTCTCCTCTGAGTGATTGACTACC |

I7 primers (701/702/703) anneal on the common universal adapter introduced during ligation step and allow to multiplex up to three samples per lane. I5 primers (501/502) anneal on LTR specific region of MuLV vector and allow to multiplex two different priming sites.

**Supplementary Table 2. List of primers used for LAM-PCR on holoclones.**

| <i>Primer name</i>  | <i>Primer sequence</i>               |
|---------------------|--------------------------------------|
| MLV 3'LTRlin_biotin | GGTACCCGTGTATCCAATAA                 |
| MLV 3'LTR_biotin    | GACTTGTGGTCTCGCTGTTCCTTGG            |
| LCrv                | GTAATACGACTCACTATAGGGC               |
| MLV 3'LTR nested    | GGTCTCCTCTGAGTGATTGACTACC            |
| LCrv                | AGGGCTCCGCTTAAGGGAC                  |
| LC1 TAlinkerMse(+)  | GTAATACGACTCACTATAGGGCTCCGCTTAAGGGAC |
| LC2 TAlinkerMse(-)  | TAGTCCCTTAAGCGGAG                    |

**Supplementary Table 3. List of primers used for PCR on meroclones and paraclones in PGc, 4Mc, and 8Mc<sub>1</sub>.**

| <i>Culture</i>   | <i>Primer name</i>       | <i>Primer sequence</i>    |
|------------------|--------------------------|---------------------------|
| PGc              | MLV 3' LTR control F     | GGACCTGAAATGACCCTGTG      |
|                  | Chr.5a                   | ACCCACAGCTCCTGTCTCAT      |
|                  | Chr.2a                   | TTCTTTCAGTCTGGTGGGGTG     |
|                  | Chr.4a                   | TGGTGGTGGAGTATCTGGAG      |
|                  | Chr.4b                   | GTGGTGGTGGAGTATCTGGAG     |
|                  | Chr.19a                  | CTCACCATCATGAGGAGCAA      |
|                  | Chr.19b                  | CTCACCATCATGAGGAGCAA      |
|                  | Chr.5b                   | GAGCAATTTGAGGGTCAGAGA     |
|                  | Chr.17c                  | GAAATCAAGATTGTATCACGTTCC  |
|                  | Chr.16                   | CTGCACACATGCCCTCTTT       |
|                  | Chr.2b                   | TCCAGGAACTTTGTTCAGA       |
|                  | Chr.3                    | CCCTAAGGAGCTCCAACCTGA     |
|                  | Chr.Y                    | CTGAGGATGGTGGCAGAAAT      |
|                  | Chr.6                    | GCCAATTAACACTCGTTCACC     |
|                  | Chr.14b                  | GGCTCCCAGGTATGTTCTCA      |
| 4Mc              | Chr.1                    | CCTGATGTTCTGTCCCCCTA      |
|                  | Chr.9a                   | GCATGCACAACAGCTCAAAC      |
|                  | Chr.14a                  | GCCTCCATTTGGAGAGAAAAT     |
|                  | Chr.15a                  | CCTCCTCCTCTTCCCTTGAT      |
| 8Mc <sub>1</sub> | Chr.8                    | CGGCAACCACTTTAAAGGAC      |
|                  | Chr.9b                   | GCCTCACTTTCTTTCTCTGTAAATG |
|                  | Chr.17a                  | GGCTCACTGCAACCTTCATC      |
|                  | Chr.X                    | CTGGAGCTGGGTGAGATAAAG     |
|                  | Chr.5c                   | GGAATGGGGCATAAGAGACA      |
| Chr.17d          | TTGAGATAGTCTTACGCTGTCACC |                           |

**Supplementary Table 4. List of independent integrations identified by NGS analysis.**

The libraries of integrations were obtained using two independent LTR-primers (3pIN, 3pOUT). The .xlsx file contains the list of independent integrations found in PGc, 4Mc, 8Mc<sub>1</sub> and 8Mc<sub>2</sub> and merged data (all\_integrations) showing integrations retrieved across samples.

## Supplementary Data

To investigate the presence of spontaneous mosaic revertants, NGS analysis was performed on pre-graft cultures. NGS sequencing was performed with the PGM (Life Technologies) with a coverage of 692 reads. We detected 12 reads (1.7%) with a G at position c.1977-1G>A in conjunction with 1977delG. The deletion leads to a frameshift in exon 15 resulting in a premature termination codon. These results were confirmed by cloning PCR products of exon 15 of transduced pre-graft cultures into a standard TA cloning vector (Stratagene). PCR products were digested with DdeI restriction enzyme, which recognizes only the wildtype or any revertant sequence (CTCAG) but not the mutant sequence. DdeI was able to cut a wildtype control but was unable to cut any of the amplified samples, hence confirming the absence of a reversion.
